# Supplementary material for: Nanosphere [Ag(SR)]n: coordination polymers of Ag+ with a combination of hydrophilic and hydrophobic thiols
Source: Royal Society of Chemistry journal article supplement (doi:10.1039/d1cc00880c), 2021-01-01
Supplement: d1cc00880c1.pdf [file d1cc00880c1.pdf]

## Supporting Information

### **Nanosphere [Ag(SR)]<sub>n</sub>: Coordination polymers of Ag<sup>+</sup> with a combination of a hydrophilic and a hydrophobic thiols**

Yan Xu, Su-Li Dong, Xiao-Sheng Yan, Qian Wang, Zhao Li and Yun-Bao Jiang\*

*Department of Chemistry, College of Chemistry and Chemical Engineering, the MOE Key Laboratory of Spectrochemical Analysis and Instrumentation, and iChEM, Xiamen University, Xiamen 361005, China*

*E-mail: ybjiang@xmu.edu.cn*

### **Electronic Supplementary Information (ESI)**

#### **CONTENTS**

|                                            |            |
|--------------------------------------------|------------|
| <b>1. Experimental Section.....</b>        | <b>S2</b>  |
| <b>2. Supplementary Spectral Data.....</b> | <b>S3</b>  |
| <b>3. Supplementary Reference.....</b>     | <b>S21</b> |

## 1. Experimental Section

**Materials.** All of the chemicals are commercially available and used without further purification. Silver nitrate ( $\text{AgNO}_3$ , >98%) was purchased from Sangon (Shanghai, China), Silver triflate ( $\text{CAgF}_3\text{O}_3\text{S}$ , 98%), Silver hexafluoroantimonate ( $\text{AgSbF}_6$ , 97%), Silver tetrafluoroborate ( $\text{AgBF}_4$ , 99%), L-cysteine (L-Cys, >99%), D-cysteine (D-Cys, 99%), L-Homocysteine (L-Hcys, >98%), Glutathione (GSH, >98%), D-penicillamine (D-Pen, >99%), N-Acetyl-L-cysteine (NACys, >98%), *n*-butyl mercaptan (*n*-BuSH, >99%) and other mercaptans ( $n\text{-C}_n\text{H}_{2n+1}\text{SH}$ ) were purchased from Energy Chemical (Shanghai, China). Other chemicals (AR) were obtained from Guoyao (Shanghai, China).

**Characterization.** Absorption spectra were recorded on a Thermo Evolution 300 absorption spectrophotometer using a 1-cm quartz cell. CD spectra were recorded on a Jasco-810 CD spectrometer. Dynamic light scattering (DLS) measurements were performed on a Malvern Zetasizer Nano ZS.  $^1\text{H}$  NMR spectra were recorded on Ascend III-850 spectrometer. High-resolution transmission electron microscopy (TEM, JEM-2100) images were taken at an accelerating voltage of 200 kV. AFM images were taken on the Cypher S facility.

**Experimental Procedures.**  $\text{Ag}^+$ -(Cys+*BuSH*) solution was prepared by added Cys (25  $\mu\text{L}$ , 2 mM) and *BuSH* (2.5  $\mu\text{L}$ , 20 mM) to 2 mL 10 mM pH 5.0 HAc-NaAc buffer solution. Then  $\text{Ag}^+$  (1.4  $\mu\text{L}$ , 50 mM) was added by titrating. The mixed solution was recorded timely by absorption spectra and CD spectra.

( $\text{Ag}^+$ -Cys)-*BuSH* solution was prepared by mixing Cys (25  $\mu\text{L}$ , 2 mM) and  $\text{Ag}^+$  (1.0  $\mu\text{L}$ , 50 mM) in 2 mL 10 mM pH 5.0 HAc-NaAc buffer solution to form  $\text{Ag}^+$ -Cys polymers first. Then *BuSH* (2.5  $\mu\text{L}$ , 20 mM) was added to the  $\text{Ag}^+$ -Cys solution. The mixed solution was recorded timely by absorption spectra and CD spectra.

( $\text{Ag}^+$ -*BuSH*)-Cys solution was prepared by mixing *BuSH* (2.5  $\mu\text{L}$ , 20 mM) and  $\text{Ag}^+$  (1.0  $\mu\text{L}$ , 50 mM) in 2 mL 10 mM pH 5.0 HAc-NaAc buffer solution to form  $\text{Ag}^+$ -*BuSH* polymers first. Then Cys (25  $\mu\text{L}$ , 2 mM) was added to the  $\text{Ag}^+$ -*BuSH* solution. The mixed solution was recorded timely by CD spectra.

The TEM samples were prepared by depositing a drop (10  $\mu\text{L}$ ) of the prepared sample solution onto a carbon-coated copper grid. A piece of filter paper was employed to remove the excess solution on the grid, and then the grid was allowed to dry under vacuum conditions.

The AFM samples were prepared by depositing a drop (10  $\mu\text{L}$ ) of the prepared sample solution onto silicon wafer interface and dried under vacuum ambient conditions. Because the size of the probe was much larger than the diameter of the nanosphere polymer (TEM), the

width measured by such probes appears much larger than it was, and the height information was used to determine the height of the nanosphere structure from side view.

## 2. Supplementary Spectral Data

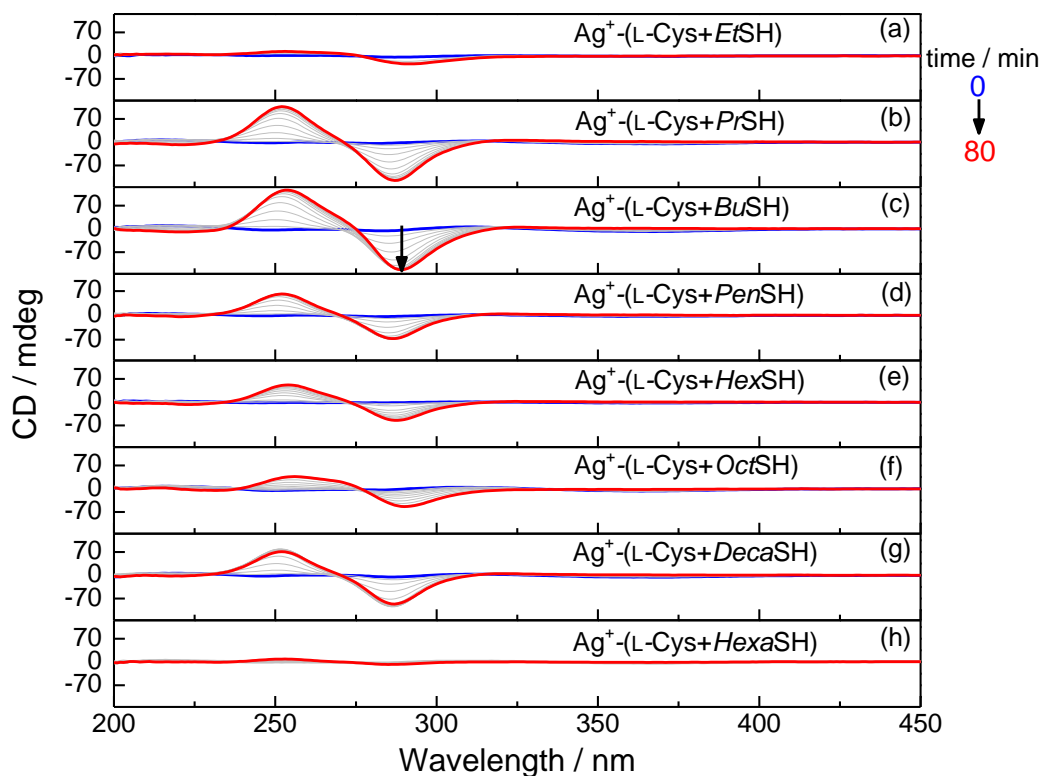

**Fig. S1** Time evolution of CD spectra of  $\text{Ag}^+(\text{L-Cys}+n\text{-C}_n\text{H}_{2n+1}\text{SH})$  in 10 mM pH 5.0 HAc-NaAc solution.  $[\text{L-Cys}] = [n\text{-C}_n\text{H}_{2n+1}\text{SH}] = 25 \mu\text{M}$ ,  $[\text{Ag}^+] = 35 \mu\text{M}$ , time = 0 - 80 min.

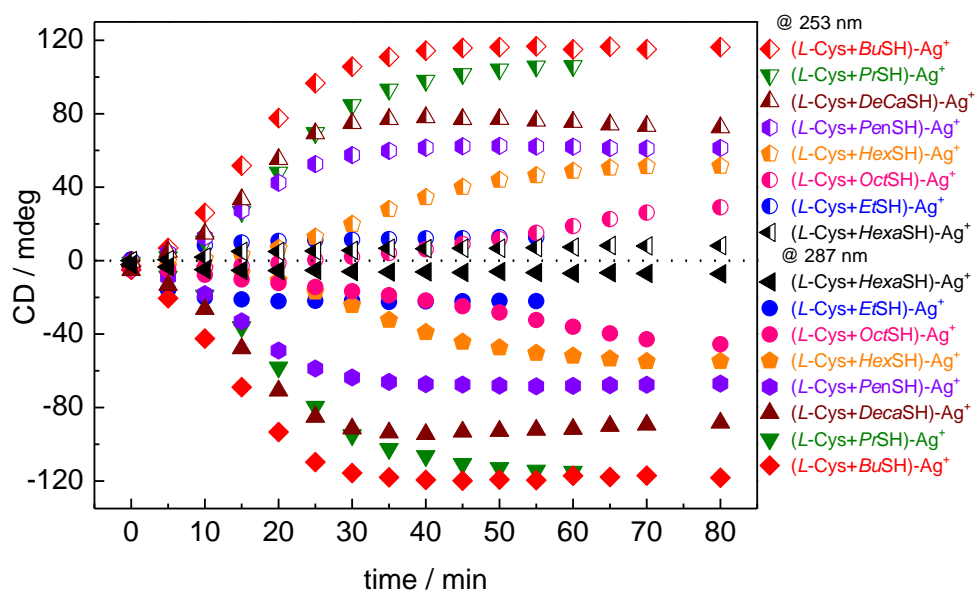

**Fig. S2** Time dependent CD signals of  $\text{Ag}^+(\text{L-Cys}+n\text{-C}_n\text{H}_{2n+1}\text{SH})$  system in 10 mM pH 5.0 HAc-NaAc solutions.  $[\text{L-Cys}] = [n\text{-C}_n\text{H}_{2n+1}\text{SH}] = 25 \mu\text{M}$ ,  $[\text{Ag}^+] = 35 \mu\text{M}$ , time = 0 - 80 min.

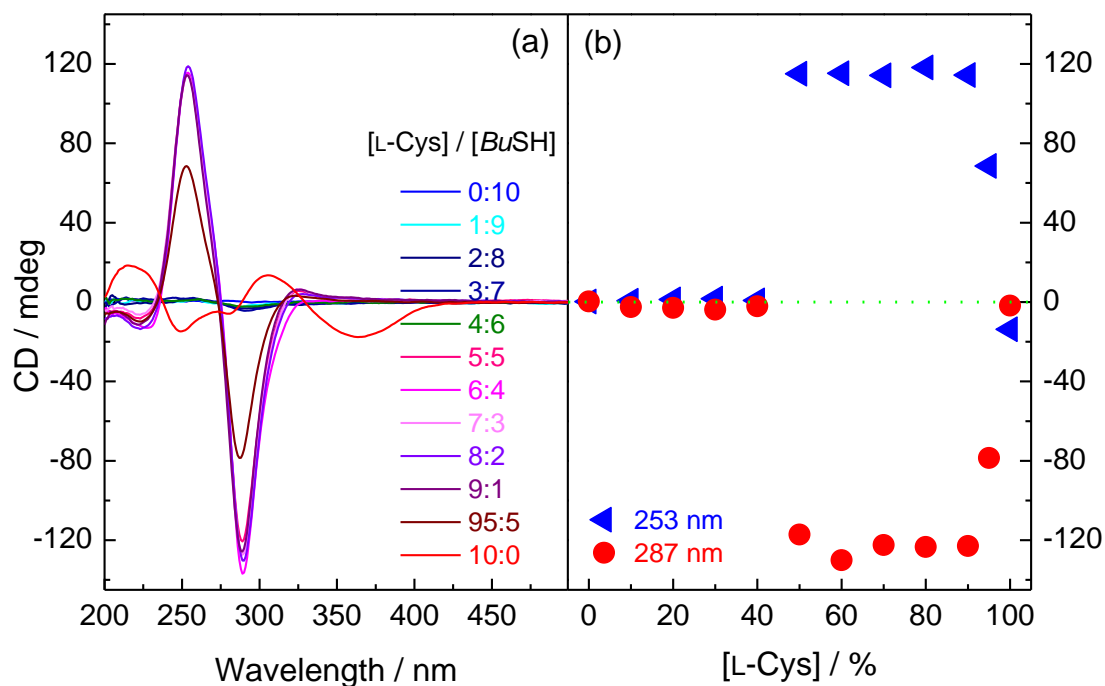

**Fig. S3** CD spectra (a) and plots of CD signals at 253 nm and 287 nm (b) of  $\text{Ag}^+(\text{L-Cys}+\text{BuSH})$  as a function of molar fraction of L-cysteine in the total thiol ligands in 10 mM pH 5.0 HAc-NaAc solution.  $[\text{L-Cys}] + [\text{BuSH}] = 50 \mu\text{M}$ ,  $[\text{Ag}^+] = 35 \mu\text{M}$ , mixing time = 80 min.

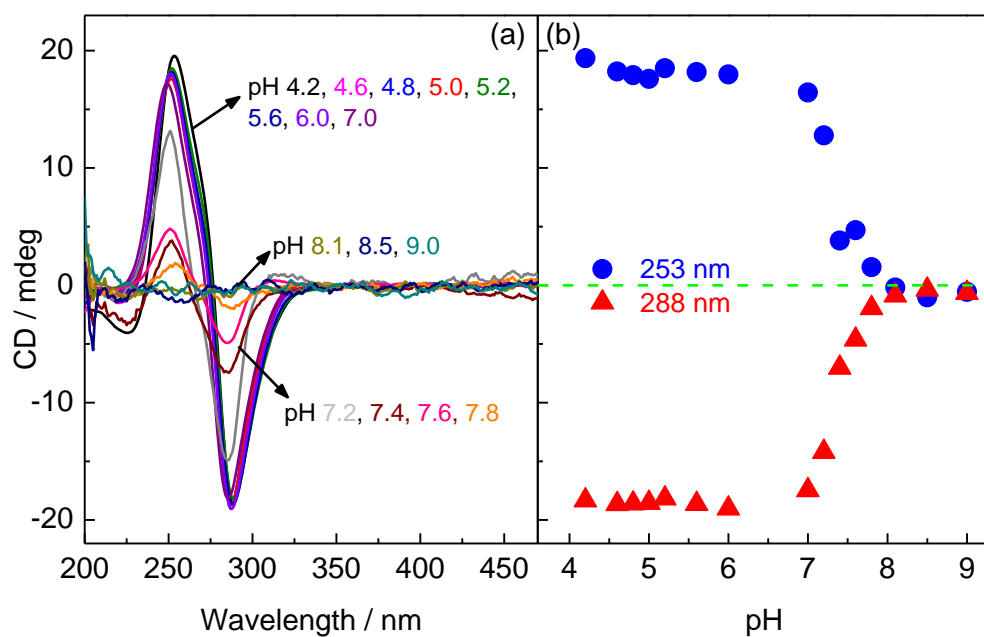

**Fig. S4** CD spectra (a) and plots of CD spectra (b) of Ag<sup>+</sup>-(L-Cys+BuSH) solutions of varying pH values. [L-Cys] = [BuSH] = 2.5  $\mu$ M, [Ag<sup>+</sup>] = 3.5  $\mu$ M, time = 80 min.

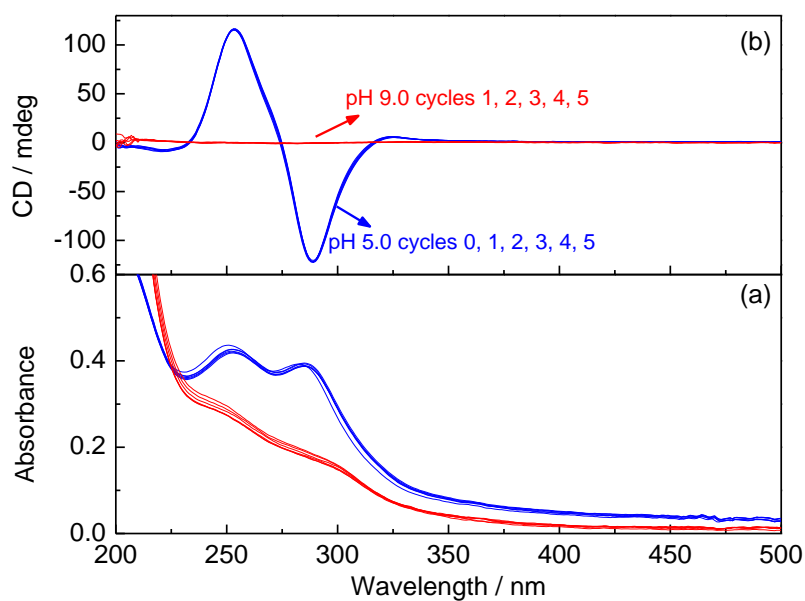

**Fig. S5** Absorption (a) and CD spectra (b) of Ag<sup>+</sup>-(L-Cys+BuSH) solution as pH was switched between 5.0 and 9.0. [L-Cys] = [BuSH] = 25  $\mu$ M, [Ag<sup>+</sup>] = 35  $\mu$ M, time = 80 min.

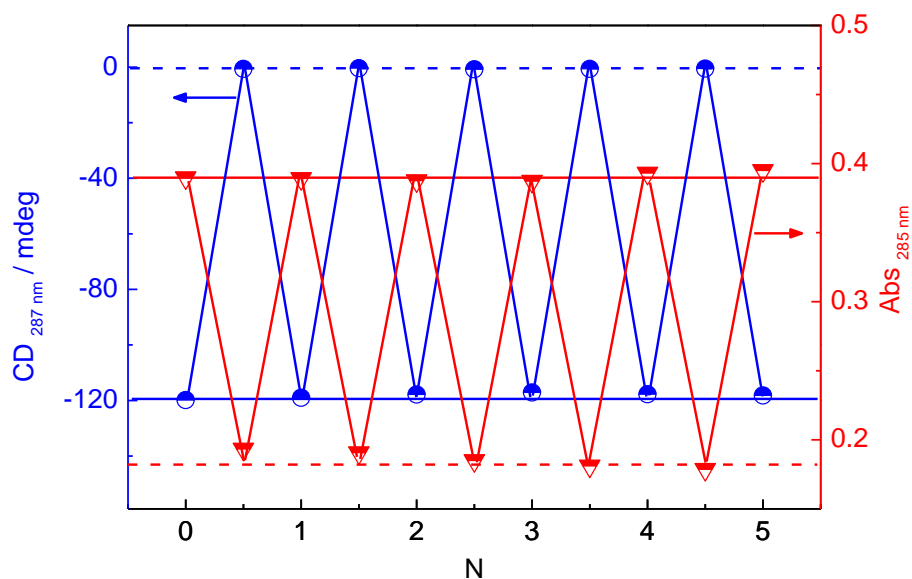

**Fig. S6** Evolution of CD ellipticity (blue) and absorbance of  $\text{Ag}^+(\text{L-Cys}+\text{BuSH})$  solution as solution pH was switched between 5.0 and 9.0.  $[\text{L-Cys}] = [\text{BuSH}] = 25 \mu\text{M}$ ,  $[\text{Ag}^+] = 35 \mu\text{M}$ , time = 80 min.

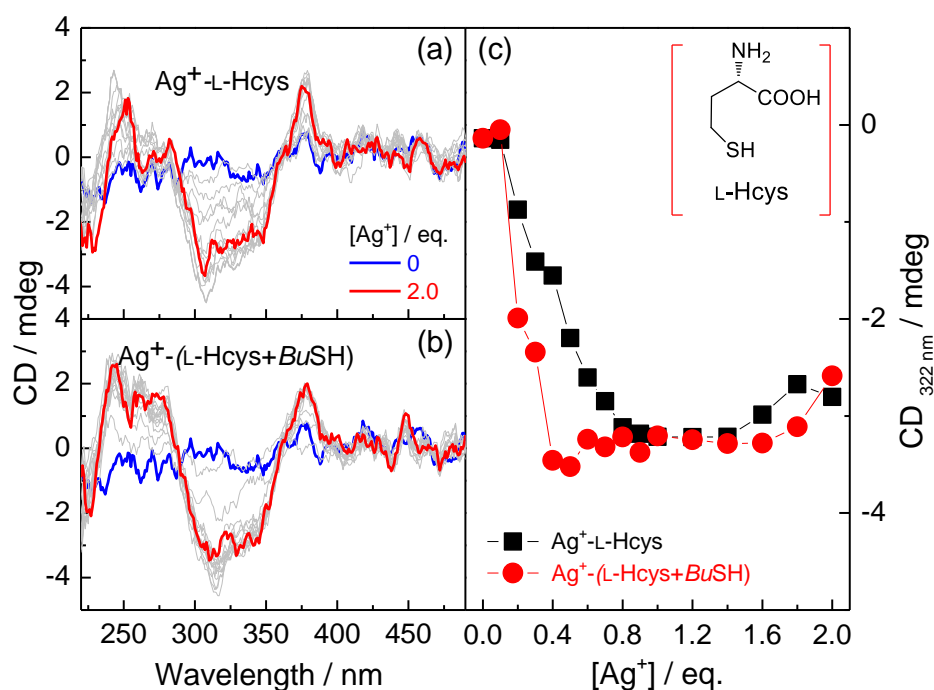

**Fig. S7** CD spectra of  $\text{Ag}^+\text{-L-Hcys}$  (a) and  $\text{Ag}^+\text{-(L-Hcys+BuSH)}$  (b), and plots of CD signal at 322 nm versus concentration of  $\text{Ag}^+$  (c) in 10 mM pH 5.0 HAc-NaAc solution.  $[\text{L-Hcys}] = [\text{BuSH}] = 25 \mu\text{M}$ ,  $[\text{Ag}^+] = 0 - 2.0 \text{ eq.}$

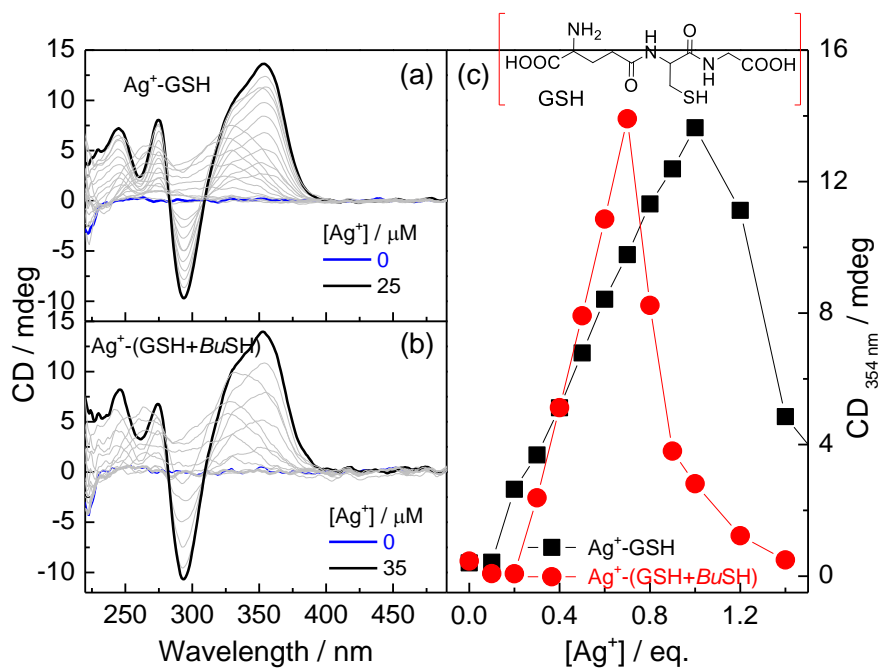

**Fig. S8** CD spectra of a) Ag<sup>+</sup>-GSH and b) Ag<sup>+</sup>-(GSH+*BuSH*) and c) plots of CD signal at 354 nm versus concentration of Ag<sup>+</sup> in 10 mM pH 3.8 HAc-NaAc buffer. [GSH] = [*BuSH*] = 25 μM, [Ag<sup>+</sup>] = 0 - 70 μM.

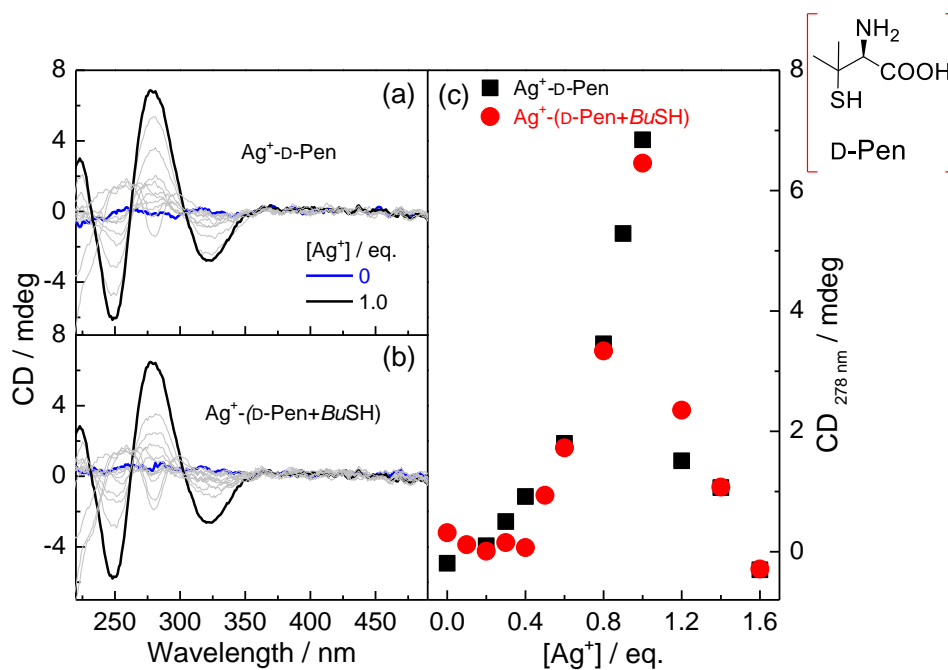

**Fig. S9** CD spectra of Ag<sup>+</sup>-D-Pen (a) and Ag<sup>+</sup>-(D-Pen+*BuSH*) (b) and plots of CD signal at 278 nm versus concentration of Ag<sup>+</sup> (c) in 10 mM pH 5.0 HAc-NaAc buffer. [D-Pen] = [*BuSH*] = 25 μM, [Ag<sup>+</sup>] = 0 - 1.6eq.

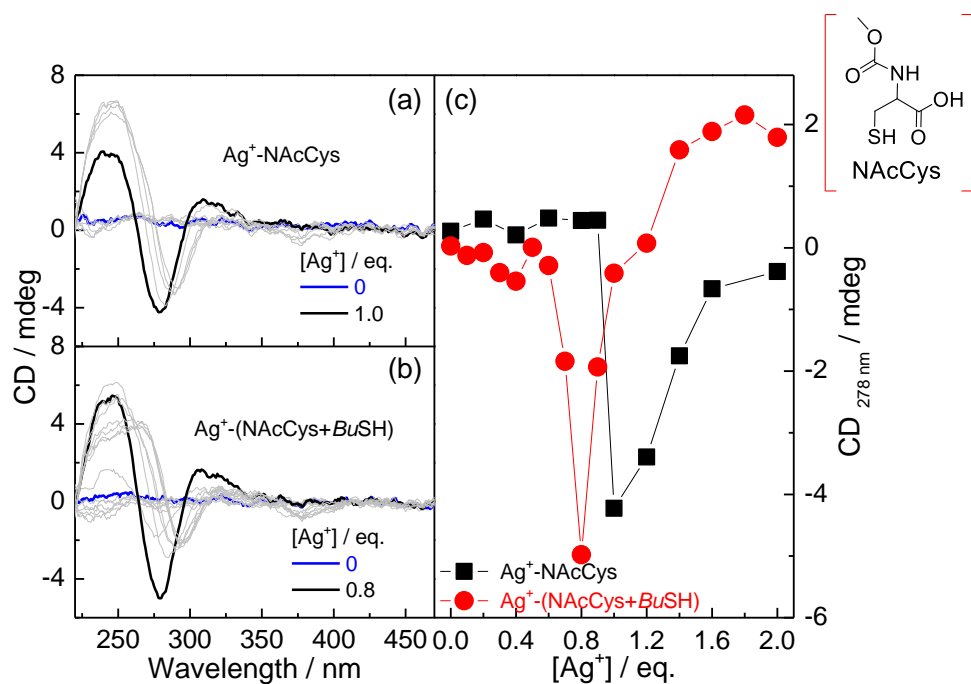

**Fig. S10** CD spectra of  $\text{Ag}^+$ -NACcys (a) and  $\text{Ag}^+$ -(NACcys+BuSH) (b), and plots of CD signal at 278 nm versus concentration of  $\text{Ag}^+$  (c) in 10 mM pH 5.0 HAc-NaAc solution.  $[\text{NACcys}] = [\text{BuSH}] = 25 \mu\text{M}$ ,  $[\text{Ag}^+] = 0 - 2.0 \text{ eq.}$

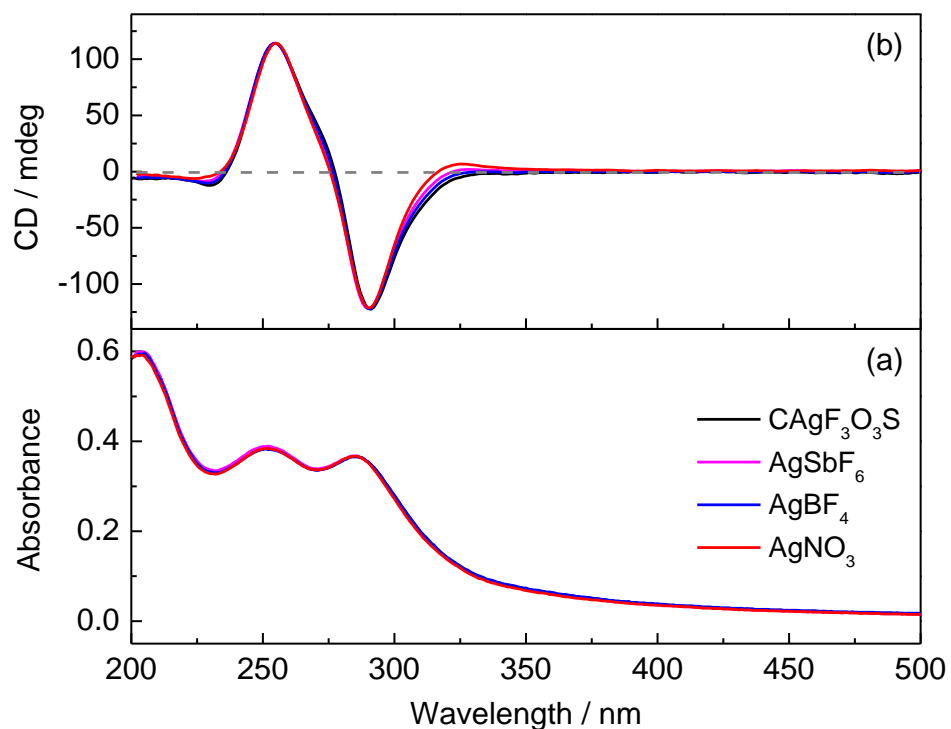

**Fig. S11** Absorption (a) and CD (b) spectra of  $\text{Ag}^+$ -(L-Cys+BuSH) with varying counter anions in 10 mM pH 5.0 HAc-NaAc buffer.  $[\text{L-Cys}] = [\text{BuSH}] = 25 \mu\text{M}$ ,  $[\text{CAgF}_3\text{O}_3\text{S}] = [\text{AgSbF}_6] = [\text{AgBF}_4] = [\text{AgNO}_3] = 35 \mu\text{M}$ , time = 80 min.

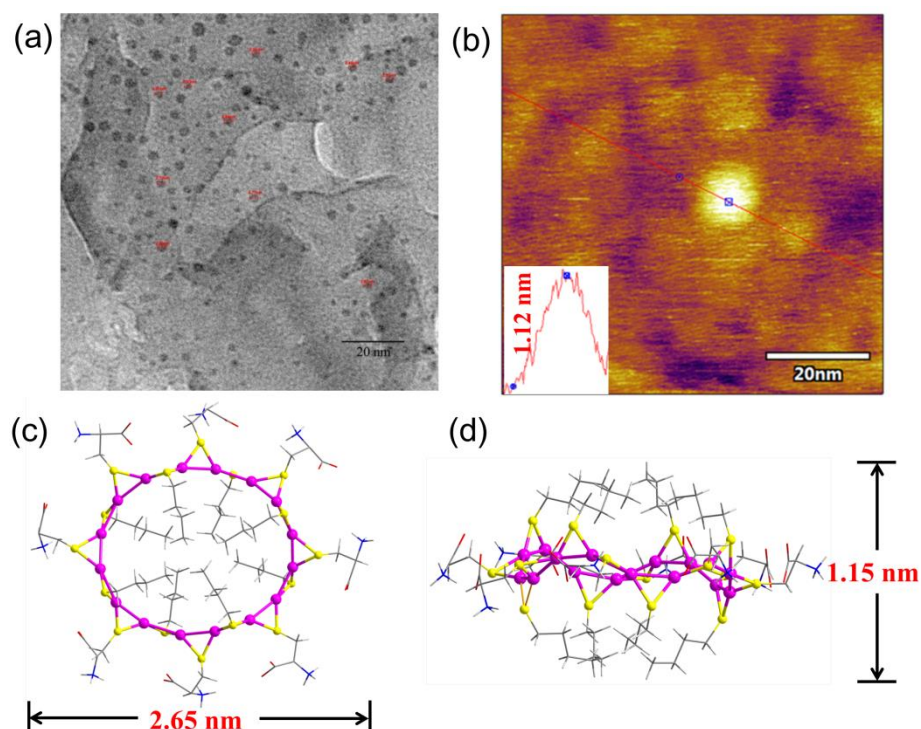

**Fig. S12** (a) High-magnification TEM image of  $\text{Ag}^+(\text{Cys}+\text{BuSH})$  polymers and (b) AFM image of  $\text{Ag}^+(\text{Cys}+\text{BuSH})$  polymers at the silicon wafer interface and height profile along the red line. (c) Width of  $\text{Ag}^+(\text{Cys}+\text{BuSH})$  polymer based on the structural model from top view shown in Scheme 1b using Gaussian modeling and (d) height of  $\text{Ag}^+(\text{Cys}+\text{BuSH})$  polymer based on the structural model from side view shown in Scheme 1b using Gaussian modeling. The structure was drawn by using Gaussian structural modelling without further optimization.

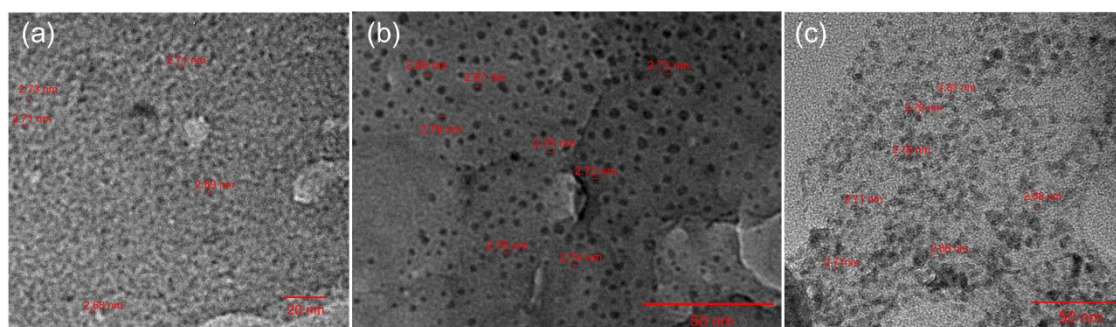

**Fig. S13** High-magnification TEM image of  $\text{Ag}^+(\text{Cys}+\text{BuSH})$  polymers varying the concentration of total thiol ligands (a-c).  $[\text{Cys}] + [\text{BuSH}] = 2 \mu\text{M}$  (a),  $5 \mu\text{M}$  (b), and  $10 \mu\text{M}$  (c),  $[\text{Ag}^+] = 0.7 \text{ eq.}$

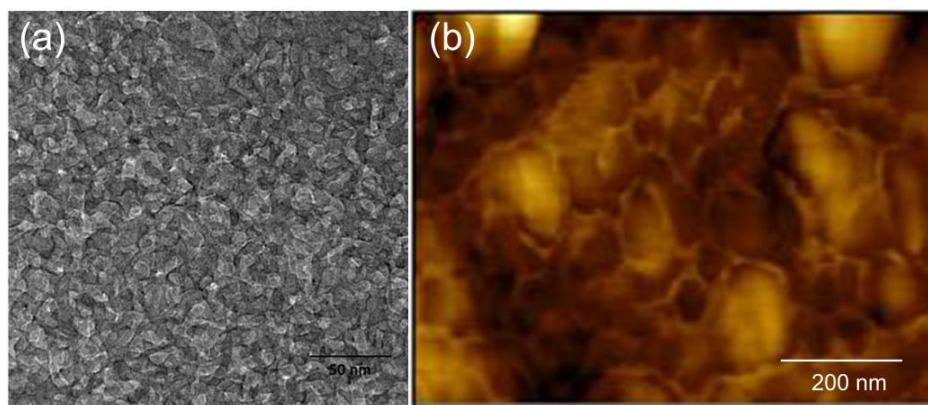

**Fig. S14** High-magnification TEM (a) and AFM (b) images of  $\text{Ag}^+$ -L-Cys polymers.

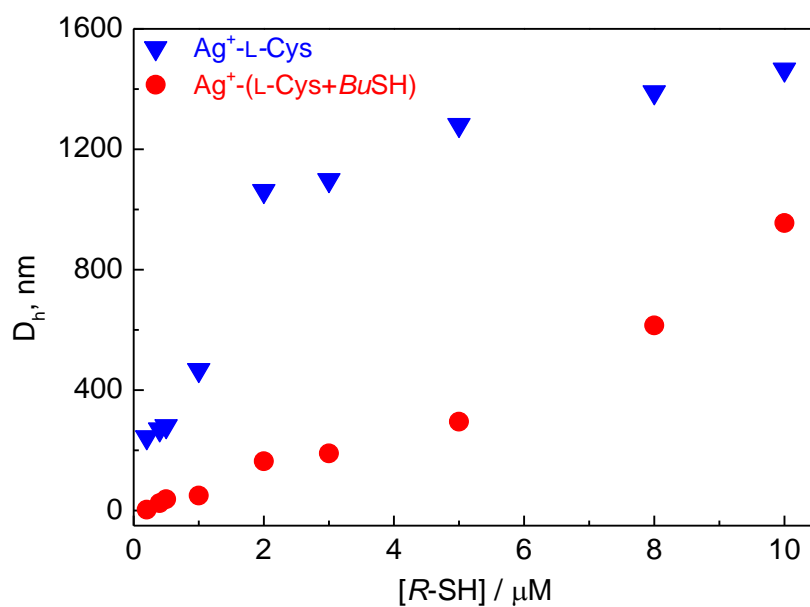

**Fig. S15** DLS measured hydrodynamic diameters ( $D_h$ ) of  $\text{Ag}^+$ -(L-Cys+BuSH) and  $\text{Ag}^+$ -L-Cys coordination polymers of varying concentration in 10 mM pH 5.0 HAc-NaAc buffer solution.  $[\text{R-SH}] = 0.2, 0.4, 0.5, 1.0, 2.0, 3.0, 5.0, 8.0, 10.0 \mu\text{M}$ ,  $[\text{Ag}^+] = 1.0 \text{ eq.}$

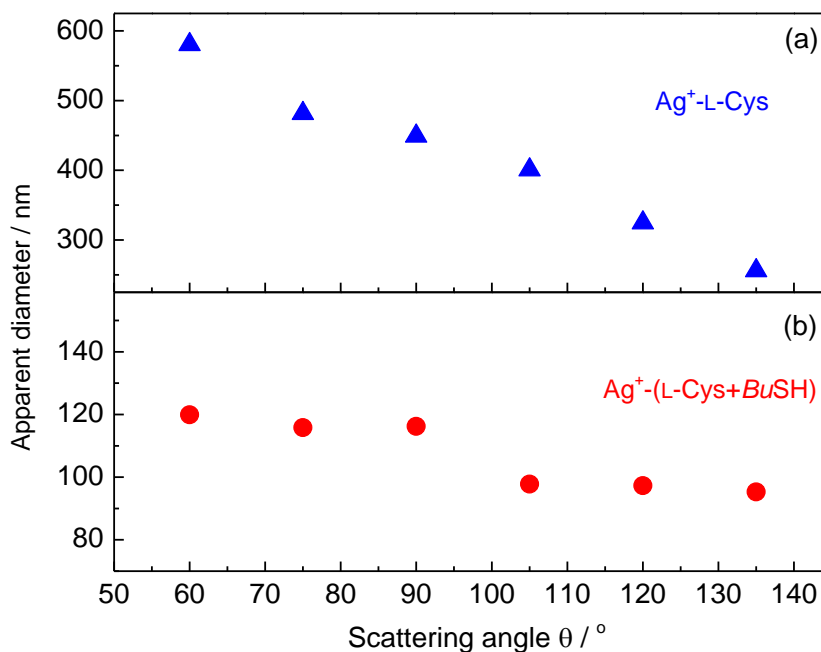

**Fig. S16** Apparent hydrodynamic diameters of Ag<sup>+</sup>-L-Cys (a) and Ag<sup>+</sup>-(L-Cys+BuSH) (b) solutions measured at different scattering angles  $\theta$  at 25 °C. [L-Cys] = 1  $\mu$ M, [Ag<sup>+</sup>] = 1.0  $\mu$ M (a); [L-Cys] = [BuSH] = 0.75  $\mu$ M, [Ag<sup>+</sup>] = 1.5  $\mu$ M (b). For species of isotropic or quasi-isotropic shape, such as spherical or quasi-spherical clusters, the diameters are invariant or weakly fluctuant at different scattering angles.<sup>1</sup> The conventional hydrodynamic diameters are measured at a fix angle of 90°. The hydrodynamic diameters of Ag<sup>+</sup>-L-Cys solutions measured at different scattering angles varied significantly, suggesting a pronounced anisotropy of the polymeric species that is indicative of the chain-like polymer structure (a). The hydrodynamic diameters of Ag<sup>+</sup>-(L-Cys+BuSH) solutions are however weakly fluctuant with scattering angles, in consistent with the nanosphere structures (b).

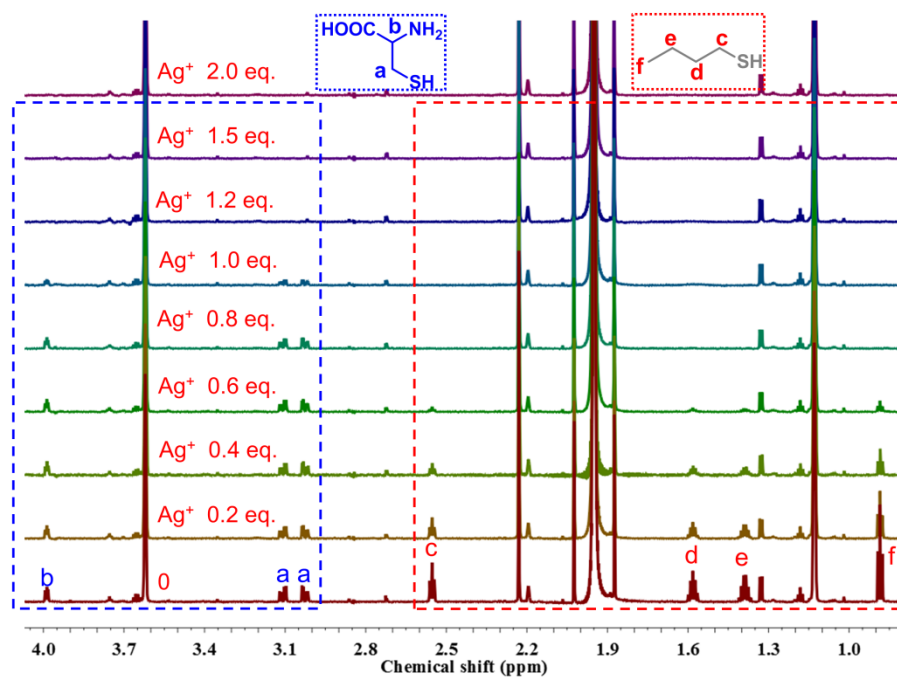

**Fig. S17** Partial <sup>1</sup>H NMR spectra of L-Cys and BuSH in the presence of Ag<sup>+</sup> in Ag<sup>+</sup>-(L-Cys+BuSH) system in 10 mM pH 5.0 HAc-NaAc D<sub>2</sub>O solution using acetone as an internal standard. [L-Cys] = [BuSH] = 50 μM, [Ag<sup>+</sup>] = 0 - 200 μM.

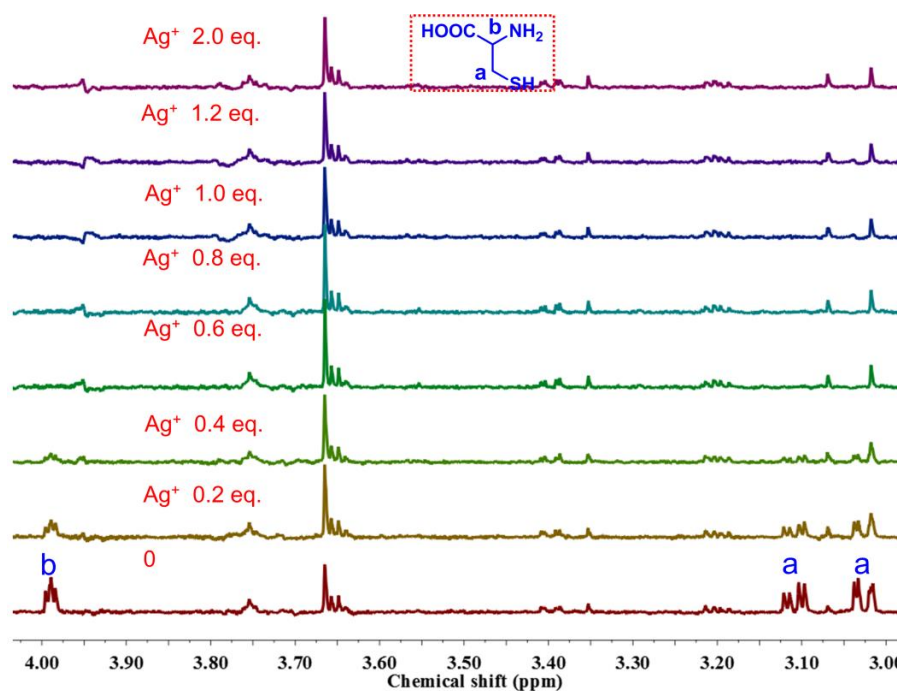

**Fig. S18** Partial <sup>1</sup>H NMR spectra Ag<sup>+</sup>-L-Cys in 10 mM pH 5.0 HAc-NaAc D<sub>2</sub>O solution using acetone as an internal standard. [L-Cys] = 50 μM, [Ag<sup>+</sup>] = 0 - 100 μM.

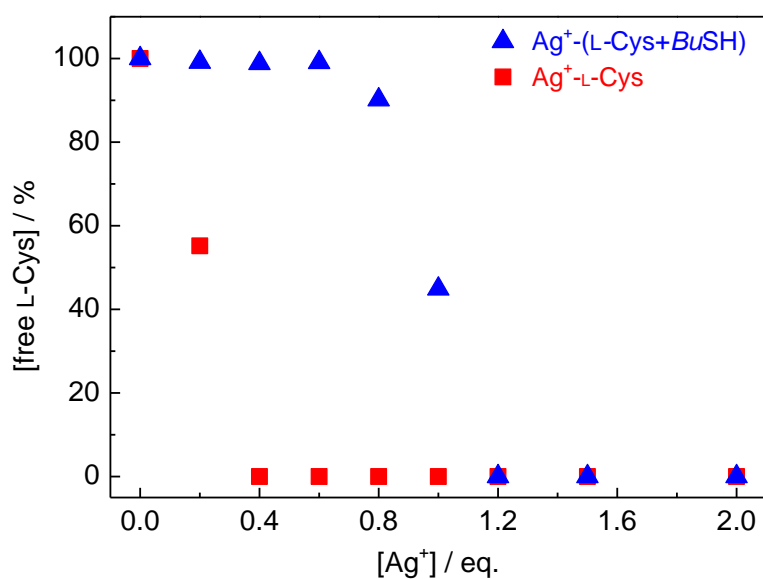

**Fig. S19** Content of free L-Cys revealed by <sup>1</sup>H NMR versus equivalent of added Ag<sup>+</sup> in Ag<sup>+</sup>-(L-Cys+BuSH) and Ag<sup>+</sup>-L-Cys system. [BuSH] = 50 μM, [L-Cys] = 50 μM, [Ag<sup>+</sup>] = 0 - 2.0 eq.

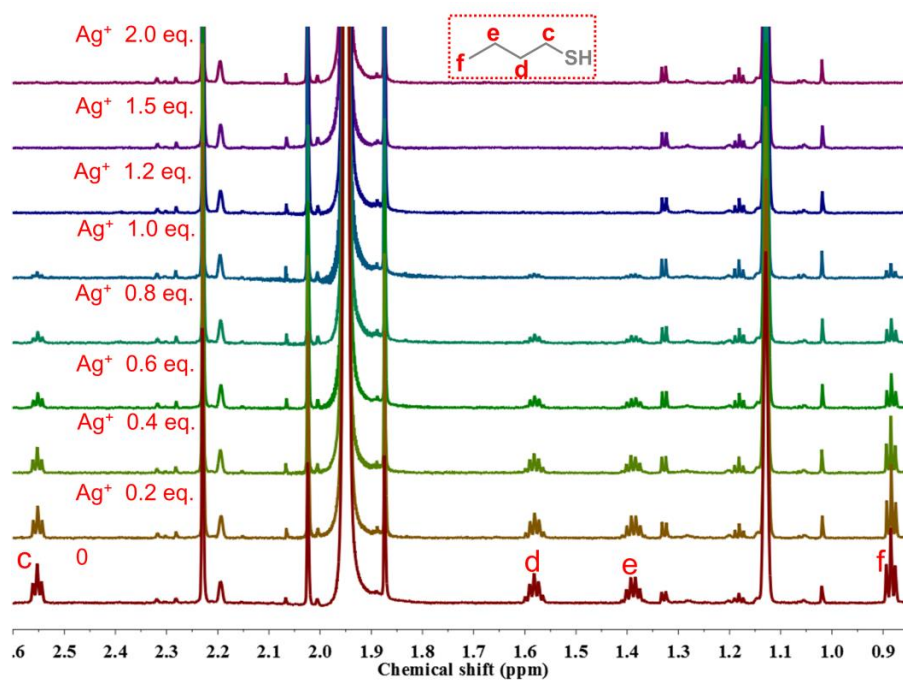

**Fig. S20** Partial <sup>1</sup>H NMR spectra of Ag<sup>+</sup>-BuSH in 10 mM pH 5.0 HAc-NaAc D<sub>2</sub>O solution using acetone as an internal standard. [BuSH] = 50 μM, [Ag<sup>+</sup>] = 0 - 100 μM.

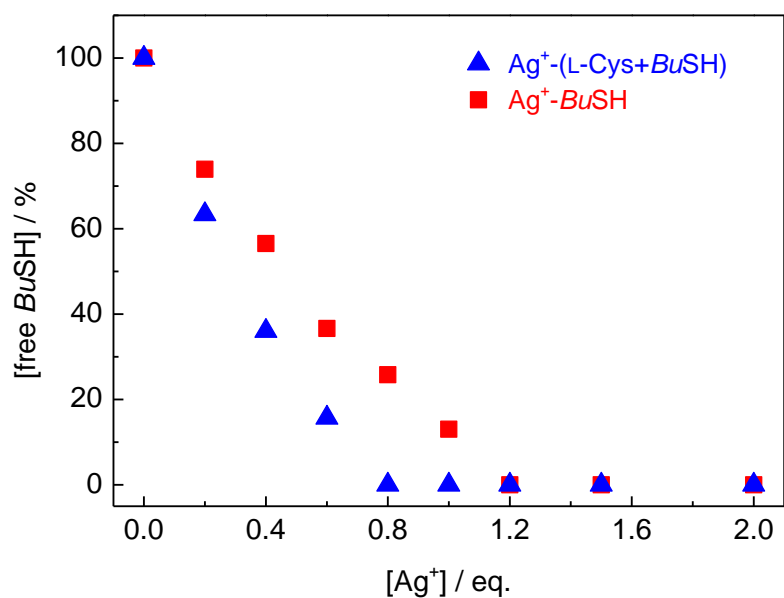

**Fig. S21** Content of free *BuSH* revealed by <sup>1</sup>H NMR versus equivalent of added Ag<sup>+</sup> in Ag<sup>+</sup>-(L-Cys+*BuSH*) and Ag<sup>+</sup>-*BuSH* system. [*BuSH*] = 50 μM, [L-Cys] = 50 μM, [Ag<sup>+</sup>] = 0 - 2.0 eq.

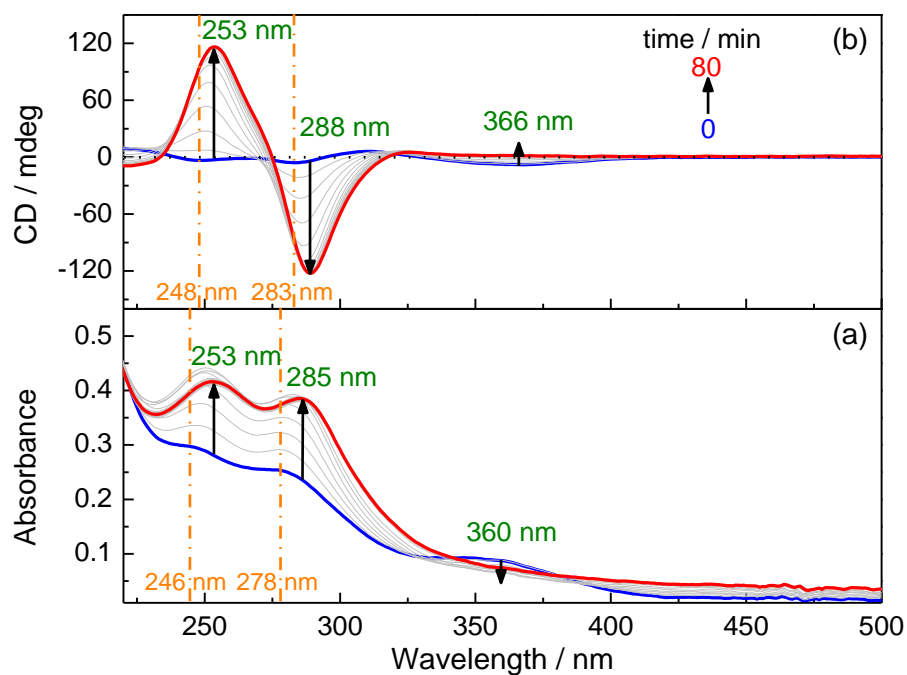

**Fig. S22** Time evolution of absorption (a) and CD (b) spectra of Ag<sup>+</sup>-(L-Cys+*BuSH*) in 10 mM pH 5.0 HAc-NaAc buffer. [L-Cys] = [*BuSH*] = 25 μM, [Ag<sup>+</sup>] = 35 μM, time = 0 - 80 min.

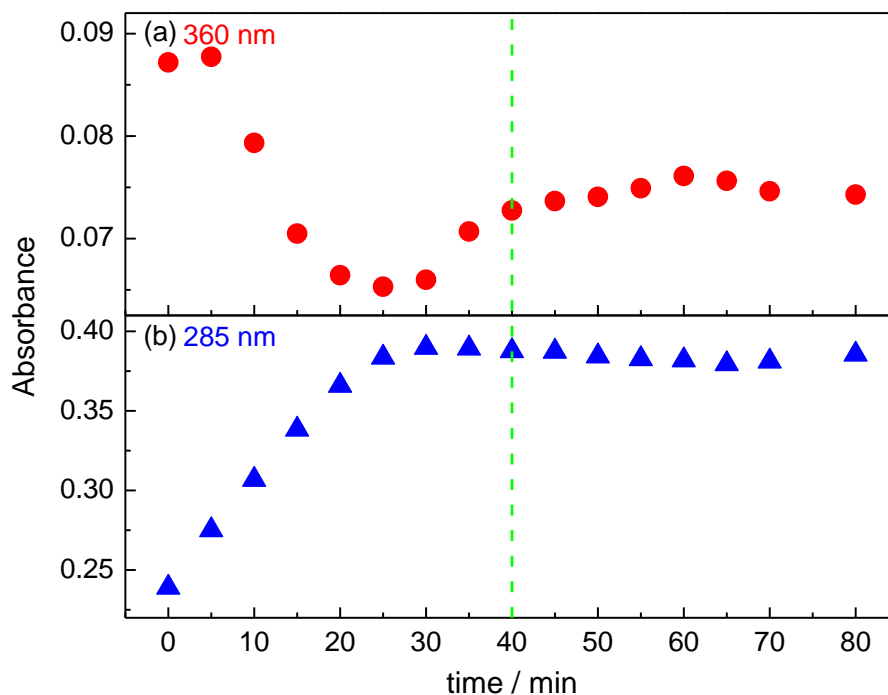

**Fig. S23** Time profiles of absorbance at 360 nm (a) and 285 nm (b) of  $\text{Ag}^+$ -(L-Cys+*BuSH*) in 10 mM pH 5.0 HAc-NaAc solution. [L-Cys] = [*BuSH*] = 25  $\mu\text{M}$ , [ $\text{Ag}^+$ ] = 35  $\mu\text{M}$ , time = 0 - 80 min.

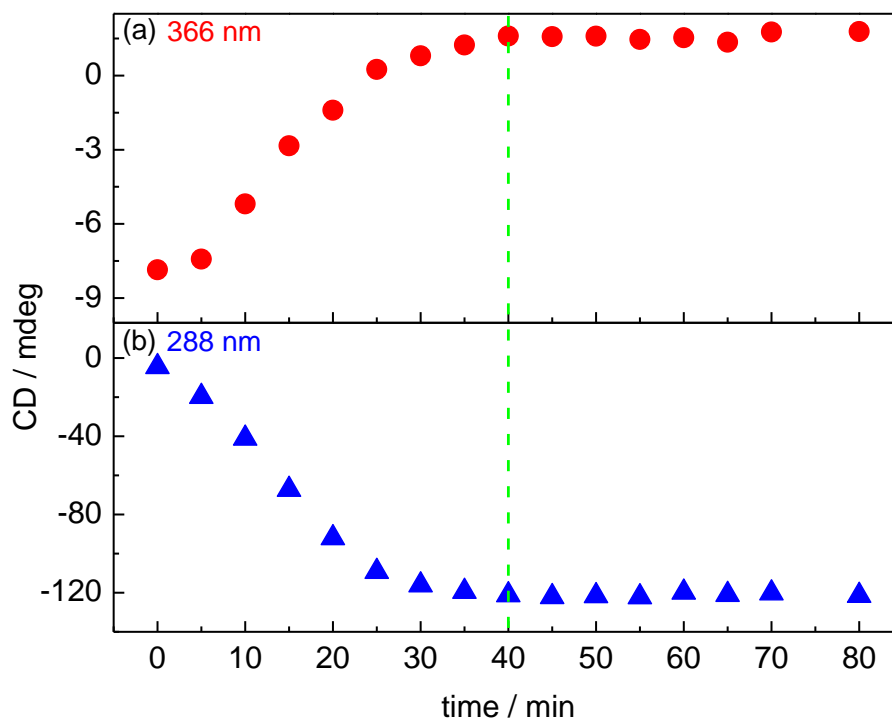

**Fig. S24** Time profiles of CD signals at 366 nm (a) and 288 nm (b) of  $\text{Ag}^+$ -(L-Cys+*BuSH*) in 10 mM pH 5.0 HAc-NaAc solution. [L-Cys] = [*BuSH*] = 25  $\mu\text{M}$ , [ $\text{Ag}^+$ ] = 35  $\mu\text{M}$ , time = 0 - 80 min.

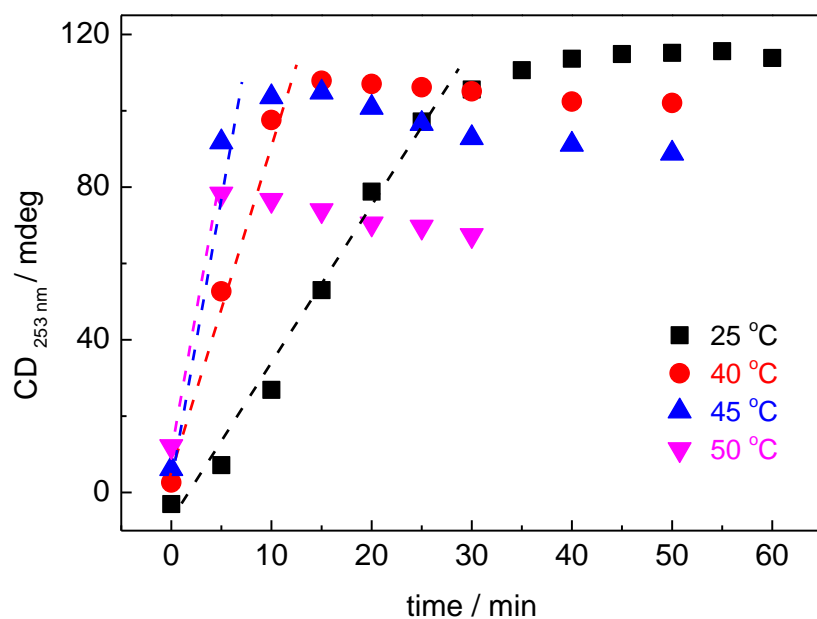

**Fig. S25** Time evolution of the CD signal at 253 nm of  $\text{Ag}^+(\text{L-Cys}+\text{BuSH})$  in 10 mM pH 5.0 HAc-NaAc solution at 25, 40, 45 and 50 °C.  $[\text{L-Cys}] = [\text{BuSH}] = 25 \mu\text{M}$ ,  $[\text{Ag}^+] = 35 \mu\text{M}$ , time = 0 - 60 min.

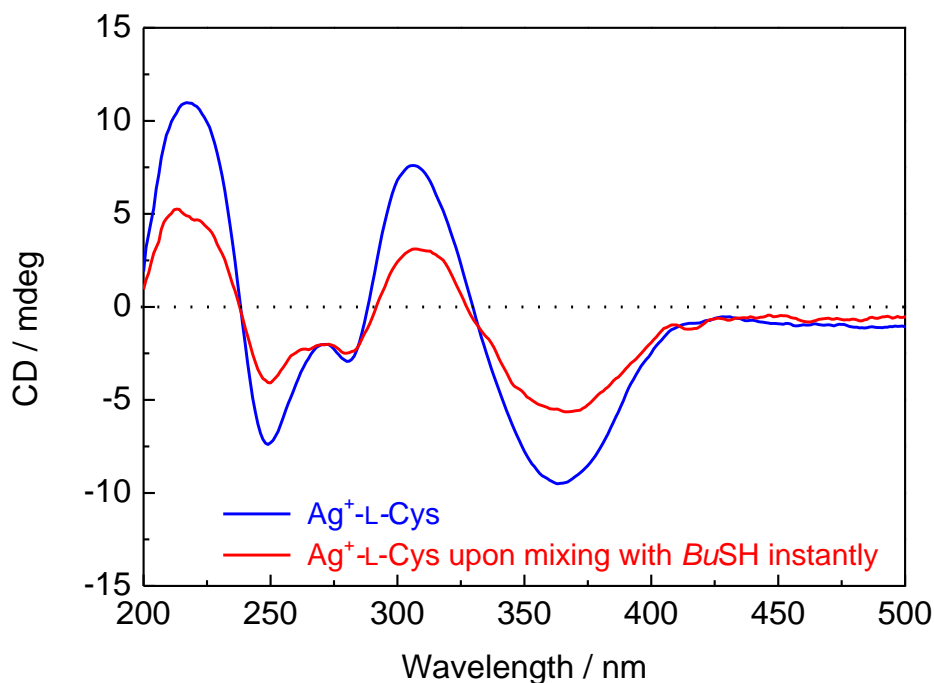

**Fig. S26** CD spectra of  $\text{Ag}^+\text{-L-Cys}$  (blue line) and of  $\text{Ag}^+\text{-L-Cys}$  upon mixing with  $\text{BuSH}$  (red line) in 10 mM pH 5.0 HAc-NaAc buffer.  $[\text{L-Cys}] = [\text{Ag}^+] = 25 \mu\text{M}$ ,  $[\text{BuSH}] = 25 \mu\text{M}$ .

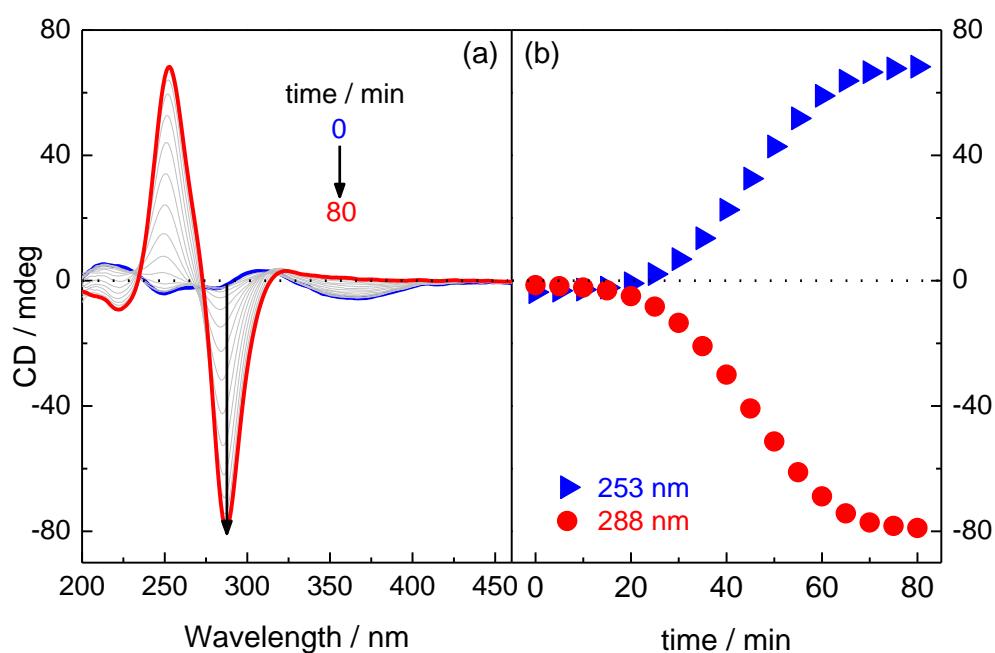

**Fig. S27** Time traces of CD spectra (a) and profiles of CD signals (b) of  $\text{Ag}^+$ -L-Cys system after adding *BuSH* in 10mM pH 5.0 HAc-NaAc buffer solution.  $[\text{L-Cys}] = [\text{Ag}^+] = 25 \mu\text{M}$ ,  $[\text{BuSH}] = 25 \mu\text{M}$ , time = 0 - 80 min.

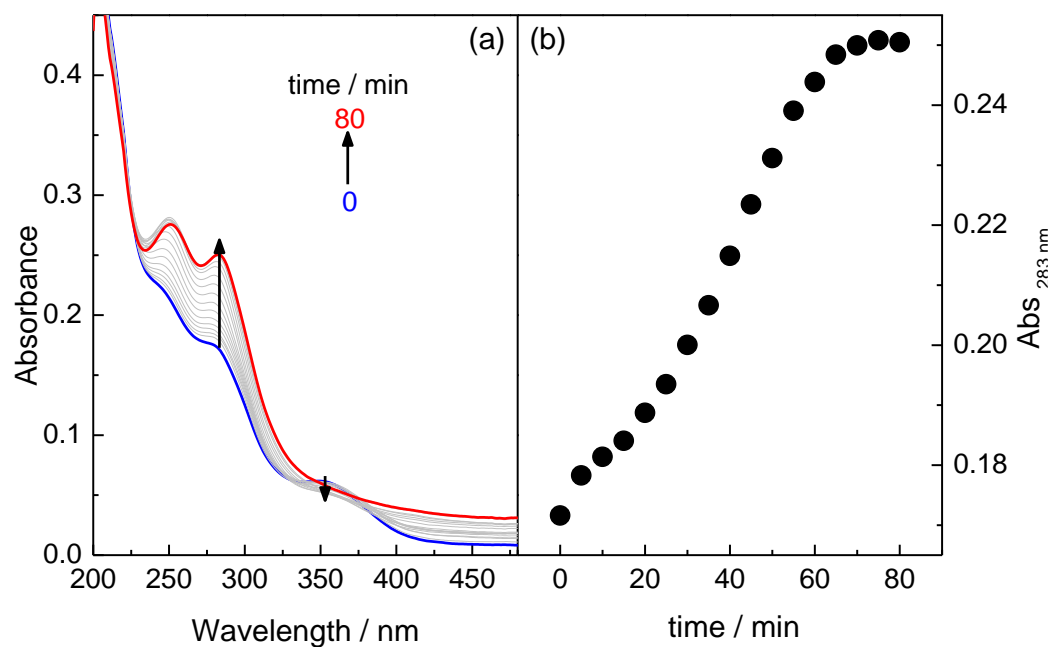

**Fig. S28** Time traces of absorption spectra (a) and profile of absorbance at 283 nm (b) of  $\text{Ag}^+$ -L-Cys system after adding *BuSH* in 10 mM pH 5.0 HAc-NaAc buffer solution.  $[\text{L-Cys}] = [\text{Ag}^+] = 25 \mu\text{M}$ ,  $[\text{BuSH}] = 25 \mu\text{M}$ , time = 0 - 80 min.

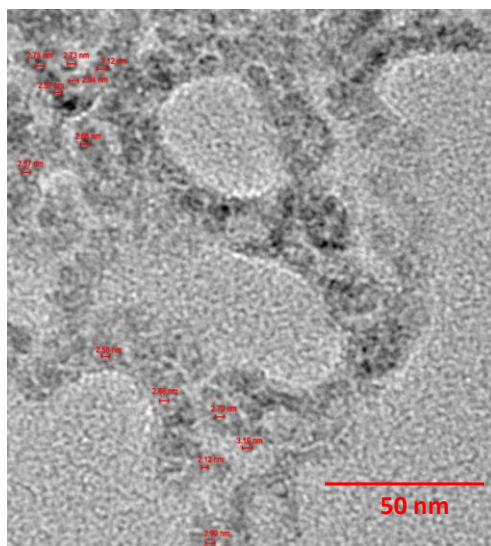

**Fig. S29** TEM image of L-Cys-Ag<sup>+</sup>-BuSH solution 80 minutes after mixing. The sample was prepared by dropping the solution onto carbon-coated copper grids followed by solvent evaporation in vacuum. [L-Cys] = [Ag<sup>+</sup>] = 5 μM, [BuSH] = 5 μM.

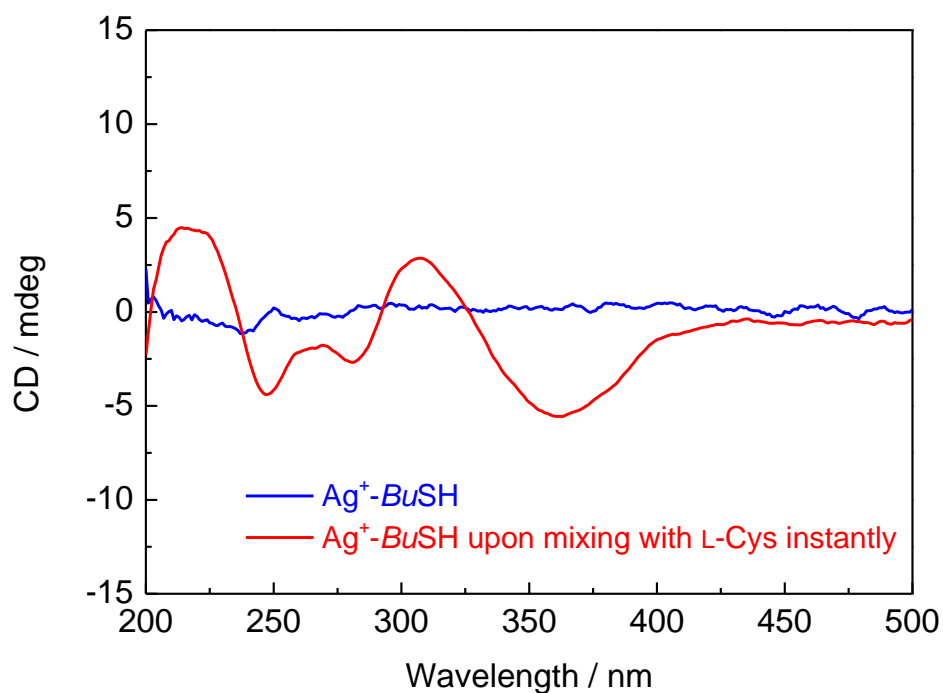

**Fig. S30** CD spectra of Ag<sup>+</sup>-BuSH (blue line) and Ag<sup>+</sup>-BuSH system upon mixing with L-Cys (red line) in 10 mM pH 5.0 HAc-NaAc buffer solution. [BuSH] = [Ag<sup>+</sup>] = 25 μM, [L-Cys] = 25 μM.

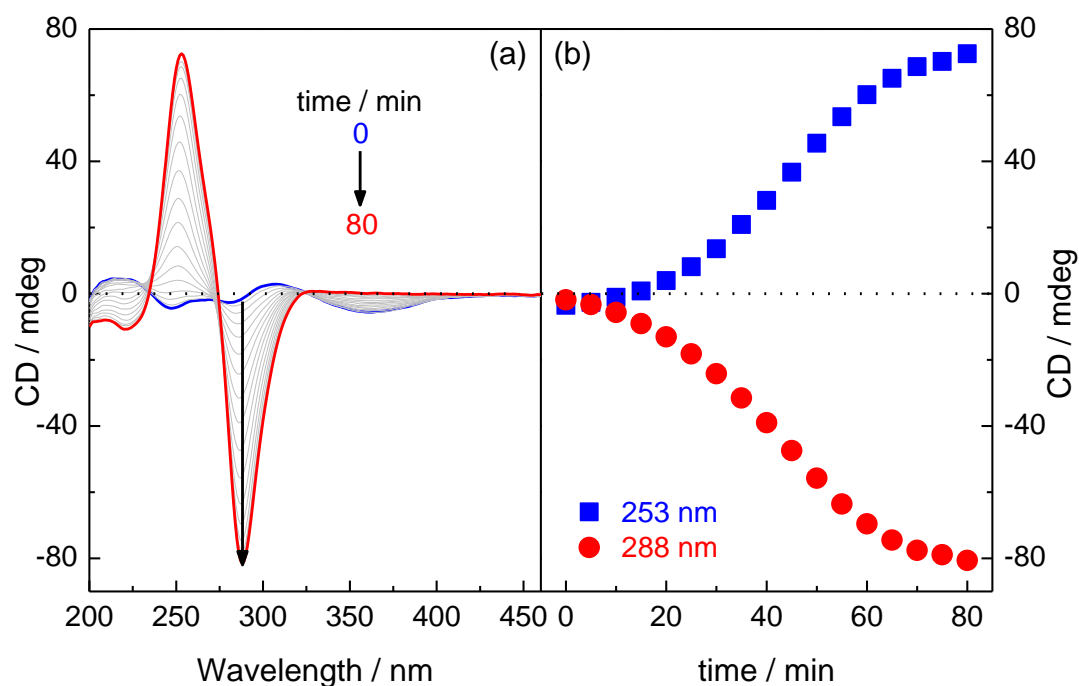

**Fig. S31** Time profiles of CD spectra (a) and CD signals (b) of  $\text{Ag}^+$ -*BuSH* system after adding L-Cys in 10 mM pH 5.0 HAc-NaAc buffer solution. [*BuSH*] = [ $\text{Ag}^+$ ] = 25  $\mu\text{M}$ , [L-Cys] = 25  $\mu\text{M}$ , time = 0 - 80 min.

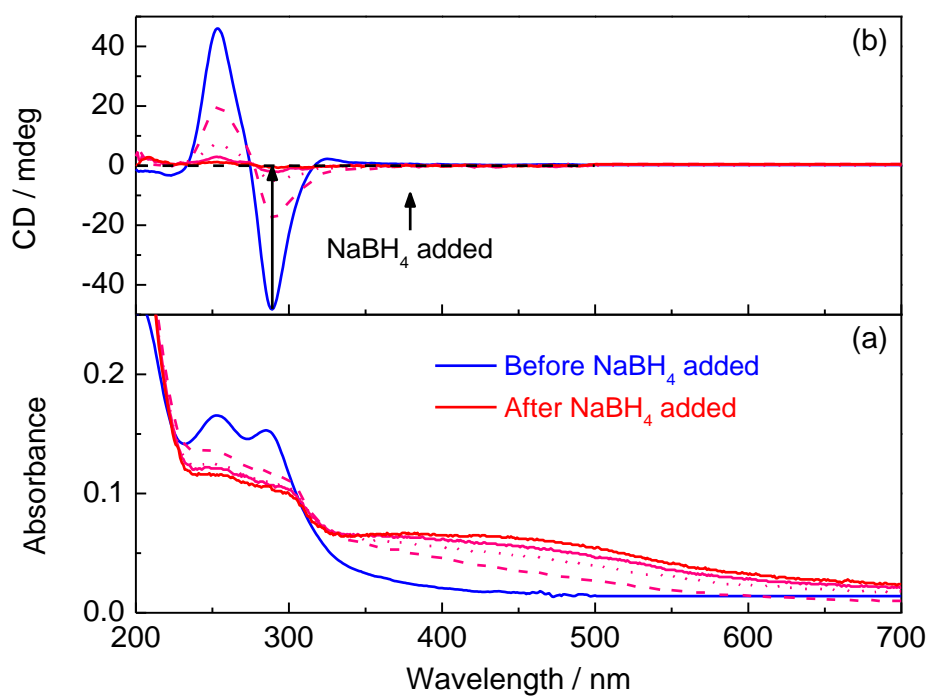

**Fig. S32** Absorption (a) and CD spectra (b) of  $\text{Ag}^+$ -(L-Cys+*BuSH*) in 10 mM pH 5.0 HAc-NaAc buffer solution upon reduction by  $\text{NaBH}_4$  of increased duration. [L-Cys] = [*BuSH*] = 10  $\mu\text{M}$ , [ $\text{Ag}^+$ ] = 14  $\mu\text{M}$ , [ $\text{NaBH}_4$ ] = 0 - 160  $\mu\text{M}$ .

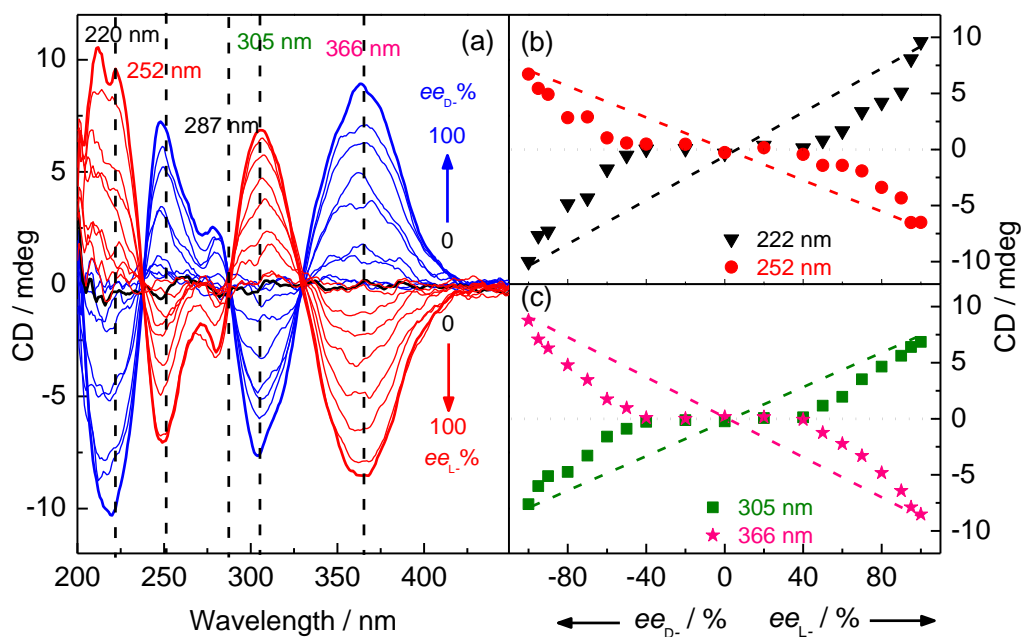

**Fig. S33** CD spectra (a) and plots of CD signals at 222 nm and 252 nm (b) and at 305 nm and 366 nm (c) of  $\text{Ag}^+$ -Cys with varying *ee* of cysteine in 10 mM HAc-NaAc buffer of pH 5.0.  $[\text{Ag}^+] = 25 \mu\text{M}$ ,  $[\text{D-Cys}] + [\text{L-Cys}] = 25 \mu\text{M}$ .

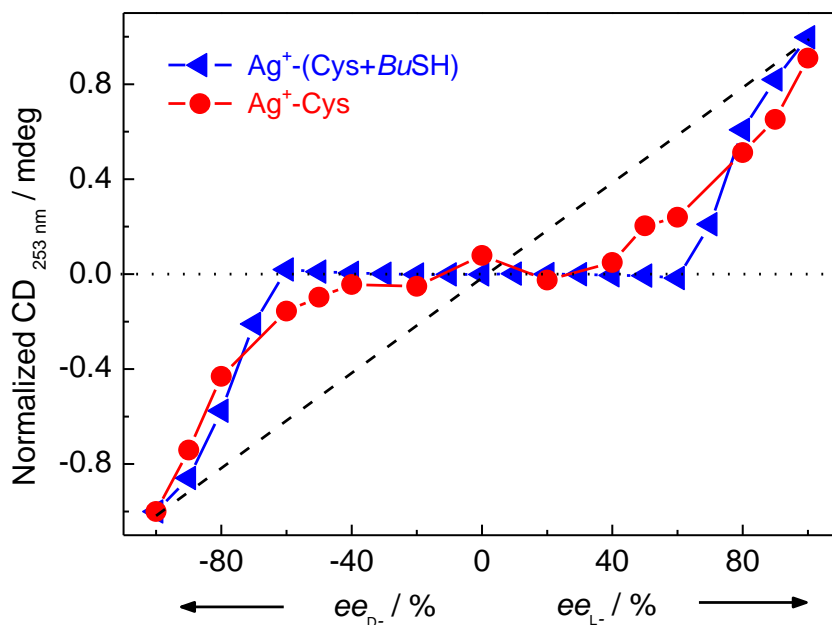

**Fig. S34** Plots of normalized CD signals at 253 nm of  $\text{Ag}^+$ -(Cys+BuSH) and  $\text{Ag}^+$ -Cys with varying *ee* of cysteine in 10 mM HAc-NaAc buffer of pH 5.0.  $[\text{BuSH}] = 25 \mu\text{M}$ ,  $[\text{D-Cys}] + [\text{L-Cys}] = 25 \mu\text{M}$ .

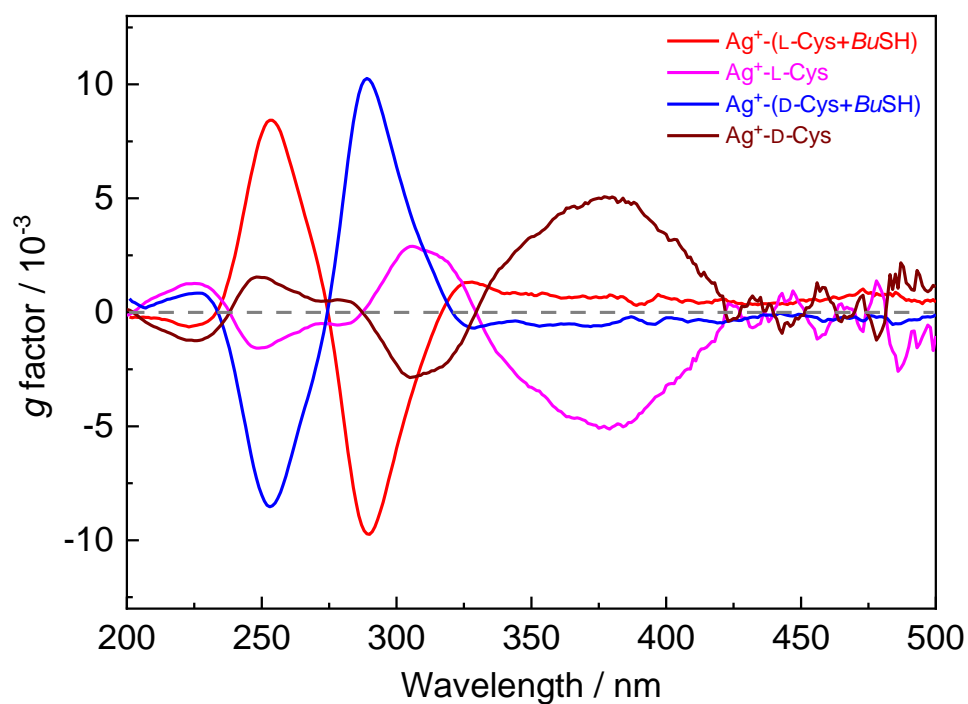

**Fig. S35** The anisotropy factor  $g$  of  $\text{Ag}^+-(\text{L-/D-Cys}+\text{BuSH})$  and  $\text{Ag}^+-\text{L-/D-Cys}$  in 10 mM HAc-NaAc buffer of pH 5.0.

### 3. Supplementary Reference

1. H. J. Schöpe, O. Marnette, W. van Megen and G. Bryant, *Langmuir*, 2007, **23**, 11534.
